# Supplementary material for: Prognostic Role of Preoperative Vascular Cell Adhesion Molecule-1 Plasma Levels in Urothelial Carcinoma of the Bladder Treated With Radical Cystectomy
Source: PubMed Central journal article supplement (PMC9246812; doi:10.1245/s10434-022-11575-4), 2022-03-26
Supplement: 10434_2022_11575_MOESM4_ESM.pdf [file 10434_2022_11575_MOESM4_ESM.pdf]

Supplementary Figure 1

Kaplan Meier estimates of oncological outcomes stratified by VCAM-1 in 1036 patients with urothelial carcinoma of the bladder (UCB) treated with radical cystectomy (RC)

(A) Recurrence-free survival

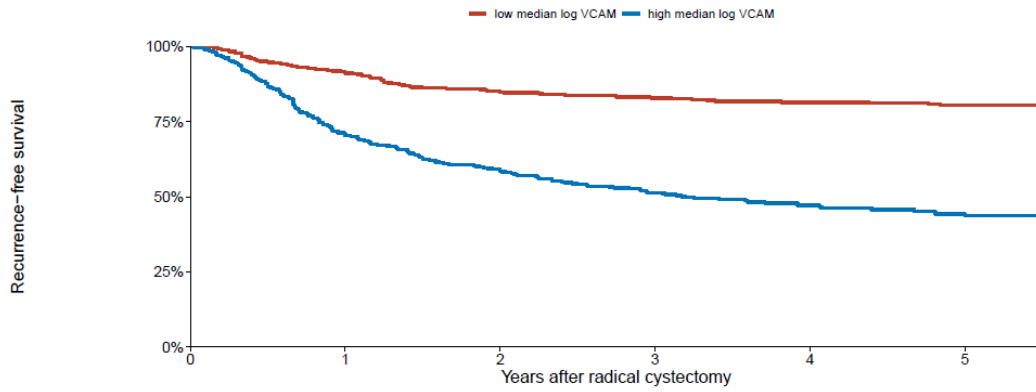

| Number at risk                 |     | 0   | 1   | 2   | 3   | 4   | 5 |
|--------------------------------|-----|-----|-----|-----|-----|-----|---|
| low median log VCAM            | 518 | 401 | 319 | 294 | 266 | 244 |   |
| high median log VCAM           | 518 | 324 | 236 | 164 | 114 | 84  |   |
| Cumulative number of events    |     | 0   | 1   | 2   | 3   | 4   | 5 |
| low median log VCAM            | 0   | 42  | 68  | 75  | 80  | 83  |   |
| high median log VCAM           | 0   | 144 | 194 | 220 | 232 | 239 |   |
| Cumulative number of censoring |     | 0   | 1   | 2   | 3   | 4   | 5 |
| low median log VCAM            | 0   | 79  | 133 | 149 | 174 | 192 |   |
| high median log VCAM           | 0   | 57  | 93  | 135 | 177 | 197 |   |

(B) Cancer-specific survival

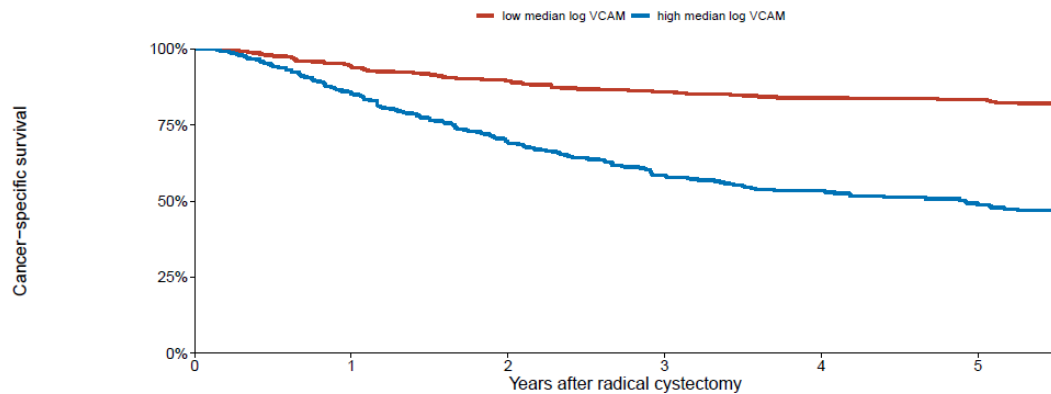

| Number at risk                 |     | 0   | 1   | 2   | 3   | 4   | 5 |
|--------------------------------|-----|-----|-----|-----|-----|-----|---|
| low median log VCAM            | 518 | 413 | 341 | 307 | 276 | 254 |   |
| high median log VCAM           | 518 | 392 | 282 | 193 | 135 | 101 |   |
| Cumulative number of events    |     | 0   | 1   | 2   | 3   | 4   | 5 |
| low median log VCAM            | 0   | 27  | 46  | 59  | 66  | 68  |   |
| high median log VCAM           | 0   | 71  | 139 | 178 | 193 | 203 |   |
| Cumulative number of censoring |     | 0   | 1   | 2   | 3   | 4   | 5 |
| low median log VCAM            | 4   | 83  | 132 | 152 | 178 | 197 |   |
| high median log VCAM           | 2   | 63  | 103 | 148 | 195 | 215 |   |

### (C) Overall survival

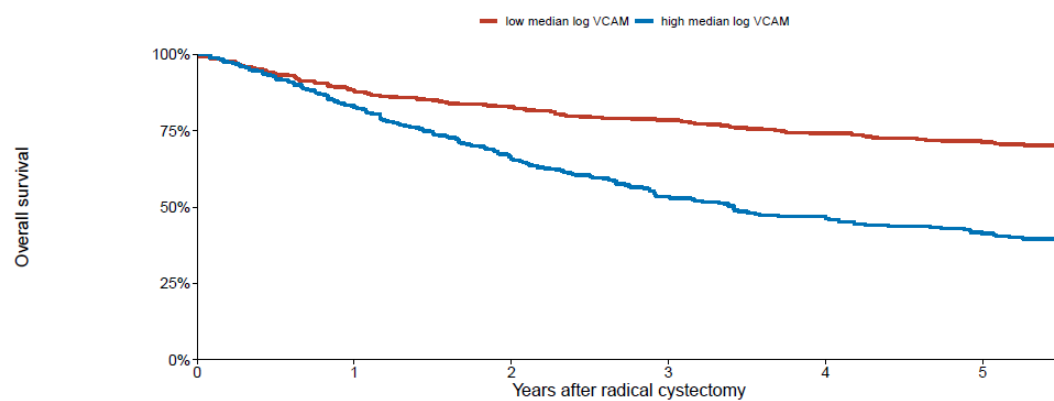

#### Number at risk

|                      | 0   | 1   | 2   | 3   | 4   | 5   |
|----------------------|-----|-----|-----|-----|-----|-----|
| low median log VCAM  | 518 | 413 | 341 | 307 | 276 | 254 |
| high median log VCAM | 518 | 392 | 282 | 193 | 135 | 101 |

#### Cumulative number of events

|                      | 0 | 1  | 2   | 3   | 4   | 5   |
|----------------------|---|----|-----|-----|-----|-----|
| low median log VCAM  | 3 | 59 | 82  | 99  | 116 | 126 |
| high median log VCAM | 0 | 86 | 160 | 208 | 231 | 244 |

#### Cumulative number of censoring

|                      | 0 | 1  | 2  | 3   | 4   | 5   |
|----------------------|---|----|----|-----|-----|-----|
| low median log VCAM  | 1 | 51 | 96 | 112 | 128 | 139 |
| high median log VCAM | 2 | 48 | 82 | 118 | 157 | 174 |
